# Supplementary material for: Reductions with SmI2: mechanistic probe for distinguishing between two operational modes of proton transfer
Source: Royal Society of Chemistry journal article supplement (doi:10.1039/b713014g), 2007-01-01
Supplement: b713014g.pdf [file b713014g.pdf]

## **Supporting Information**

### **Reductions with SmI<sub>2</sub>: Mechanistic Probe for Distinguishing Between Two Operational Modes of Proton Transfer**

Alexander Tarnopolsky and Shmaryahu Hoz\*

*Department of Chemistry, Bar-Ilan University, Ramat-Gan 52900, Israel  
shoz@mail.biu.ac.il*

Table S1: ET30 for THF solutions of MeOH, TFE and i-PrOH.

| <b>ROH</b> | <b>[ROH] (M)</b> | <b><math>\lambda_{\max}</math>(nm)</b> | <b>ET30 (kcal/mol)</b> |
|------------|------------------|----------------------------------------|------------------------|
| MeOH       | 1                | 654                                    | 43.7                   |
| MeOH       | 0.5              | 684                                    | 41.8                   |
| MeOH       | 0.25             | 704                                    | 40.6                   |
| MeOH       | 0.0625           | 748                                    | 38.2                   |
| MeOH       | 0                | 764                                    | 37.4                   |
| TFE        | 1                | 561                                    | 51                     |
| TFE        | 0.5              | 581                                    | 49.2                   |
| TFE        | 0.25             | 607                                    | 47.1                   |
| TFE        | 0.0625           | 659                                    | 43.4                   |
| TFE        | 0                | 765                                    | 37.4                   |
| i-PrOH     | 1                | 689                                    | 41.5                   |
| i-PrOH     | 0.5              | 709                                    | 40.3                   |
| i-PrOH     | 0.25             | 728                                    | 39.3                   |
| i-PrOH     | 0.0625           | 754                                    | 37.9                   |

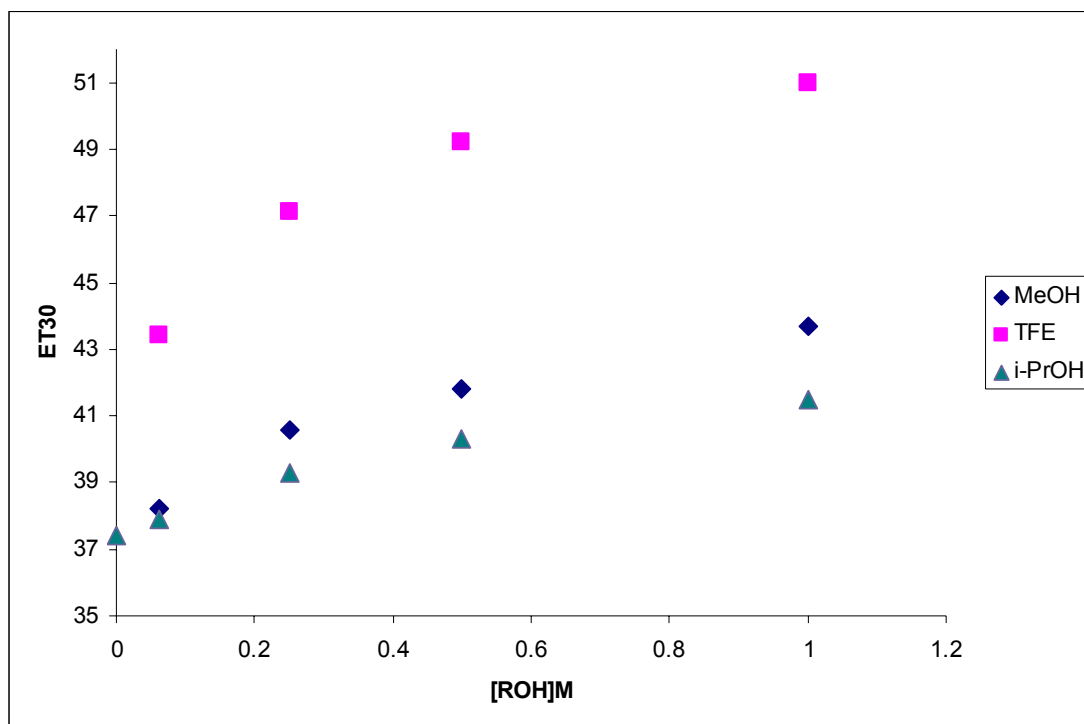

Figure S1: ET30 values as a function of [ROH] concentration.

Table S2: Reaction scheme and Data used for the SPECFIT simulation.

| Simulation                                                                                 | kf       | kb       | [H <sub>2</sub> O] | k_obs |
|--------------------------------------------------------------------------------------------|----------|----------|--------------------|-------|
| SmI <sub>2</sub> + MeOH <====><br>SmI <sub>2</sub> (MeOH)                                  | 1.00E+07 | 5.00E+07 | 1.04               | 830   |
| SmI <sub>2</sub> (MeOH) + MeOH<br><====> SmI <sub>2</sub> (MeOH) <sub>2</sub>              | 2.00E+08 | 5.00E+07 | 0.52               | 830   |
| SmI <sub>2</sub> (MeOH) <sub>2</sub> + MeOH<br><====> SmI <sub>2</sub> (MeOH) <sub>3</sub> | 4.00E+09 | 5.00E+07 | 0.26               | 820   |
| SmI <sub>2</sub> (MeOH) <sub>3</sub> + MeOH<br><====> SmI <sub>2</sub> (MeOH) <sub>4</sub> | 8.00E+10 | 5.00E+07 | 0.129              | 780   |
| Substrate + SmI <sub>2</sub> (MeOH)                                                        | 7.00E+04 |          | 0.0645             | 390   |
| Substrate + SmI <sub>2</sub> (MeOH) <sub>2</sub>                                           | 1.40E+05 |          | 0.03225            | 72    |
| Substrate + SmI <sub>2</sub> (MeOH) <sub>3</sub>                                           | 2.10E+05 |          | 0.016625           | 6.9   |
| Substrate + SmI <sub>2</sub> (MeOH) <sub>4</sub>                                           | 2.80E+05 |          | 0.008813           | 0.88  |
|                                                                                            |          |          | 0.004906           | 0.25  |
|                                                                                            |          |          | 0.002953           | 0.13  |
|                                                                                            |          |          | 0.001              | 0.039 |
